# Supplementary material
Source: HighWire-hosted journal article supplement (http://molpharm.aspetjournals.org/highwire/filestream/77110/field_highwire_adjunct_files/0/Supplemental_figure_legends-R1.pdf)
Supplement: Supplemental_figure_legends-R1.pdf [file Supplemental_figure_legends-R1.pdf]

## Molecular Pharmacology

### Lapatinib-mediated COX-2 expression via EGFR/HuR interaction enhances the aggressiveness of triple-negative breast cancer cells

*Te-Chun Hsia\*, Chih-Yen Tu\*, Yun-Ju Chen, Ya-Ling Wei, Meng-Chieh Yu, Sheng-Chie Hsu, Shing-Ling Tsai, Wen-Shu Chen, Ming-Hsin Yeh, Chia-Jui Yen, Yung-Luen Yu, Tzung-Chi Huang, Chih-Yang Huang, Mien-Chie Hung, and Wei-Chien Huang*

### Supplemental Figures

#### Supplemental Figure S1

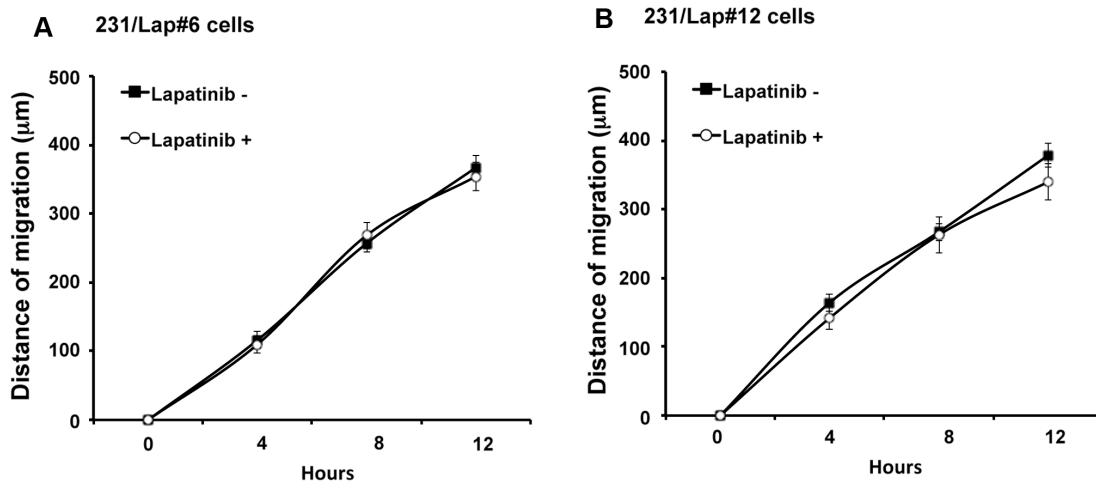

**Figure S1. The effects of lapatinib treatment on the growth rate of TNBC cells.** A and B, The cell growths of 231/Lap#6 (A) and 231/Lap#12 (B) cells treated with or without lapatinib were measured by MTT assays.

**Supplemental Figure S2**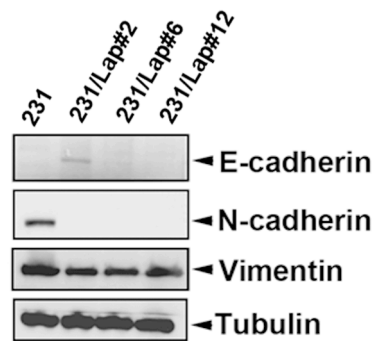

**Figure S2.** The effects of lapatinib treatment on the induction of markers of the epithelial-mesenchymal transition (EMT) in TNBCs. Whole cell lysates were prepared from the indicated cells and subjected to immunoblotting analyses with the indicated antibodies.

**Supplemental Figure S3**

231/Lap#6 cells

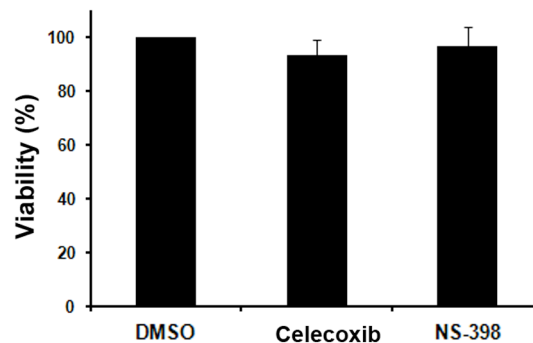

**Figure S3.** The involvement of selective COX-2 inhibitors in the viability of lapatinib-treated TNBC cells. Treatment with 30  $\mu$ M celecoxib or with 30  $\mu$ M NS-398 for 24 h did not significantly affect cell viability of 231/Lap#6 cells in the MTT assay. The data are represented as the mean  $\pm$  SD.

Supplemental Figure S4

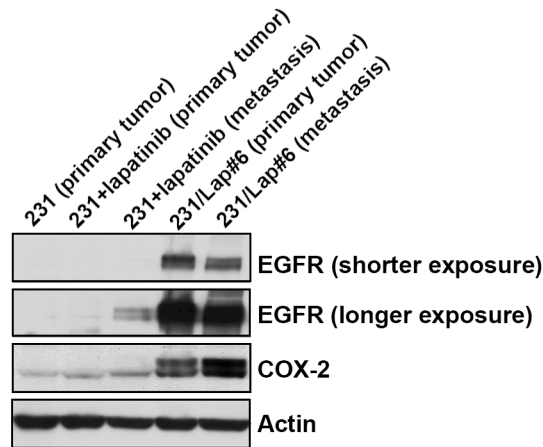

**Figure S4. EGFR and COX-2 expressions in xenograft tumors from metastasis sections of MDA-MB-231 with lapatinib treatment or 231/Lap#6 cells.**

Tumor tissues from different groups in the experiments shown in Figure 1I were homogenized and subjected to immunoblotting analyses with anti-EGFR, anti-COX-2, or anti-actin antibodies.

Supplemental Figure S5

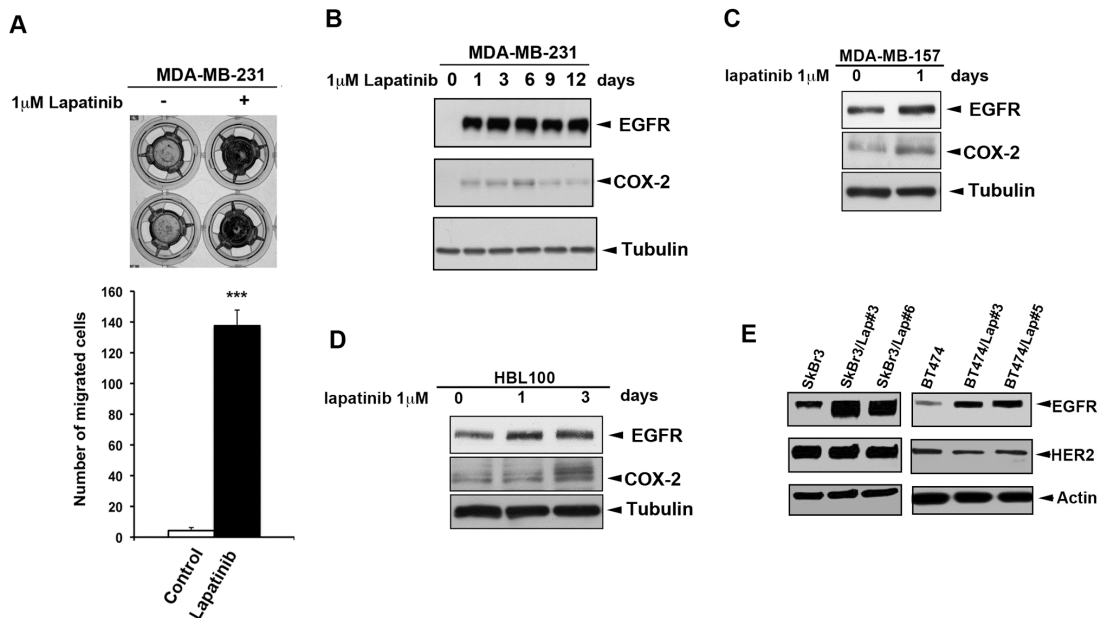

**Figure S5. The effects of short-term treatment with lapatinib on EGFR and COX-2**

**expression and cell migration in TNBC cells.**

A, The migration abilities of MDA-MB-231 cells after treatment with lapatinib for 24h were determined by the transwell migration assay. B-D, Whole cell lysates from lapatinib-treated MDA-MB-231 (B), MDA-MB-157 (C), and HBL100 (D) cells were subjected to immunoblotting analyses with the indicated antibodies. E, Whole cell lysates prepared from SkBr3 and BT474 and their lapatinib-resistant clones were subjected to immunoblotting analyses with the indicated antibodies.
